# Supplementary material for: Sol–gel deposited Cu2O and CuO thin films for photocatalytic water splitting
Source: Royal Society of Chemistry journal article supplement (doi:10.1039/c4cp03241a), 2014-01-01
Supplement: c4cp03241a1.pdf [file c4cp03241a1.pdf]

## Electronic Supplementary Information

### Sol-gel deposited $\text{Cu}_2\text{O}$ and $\text{CuO}$ thin films for photocatalytic water splitting

Yee-Fun Lim,<sup>\*a</sup> Chin Sheng Chua,<sup>a</sup> Coryl Jing Jun Lee,<sup>a</sup> and Dongzhi Chi<sup>a</sup>

<sup>a</sup> Institute of Materials Research and Engineering, A\*STAR (Agency for Science, Technology and Research), Singapore 117602, Singapore.

E-mail: limyf@imre.a-star.edu.sg

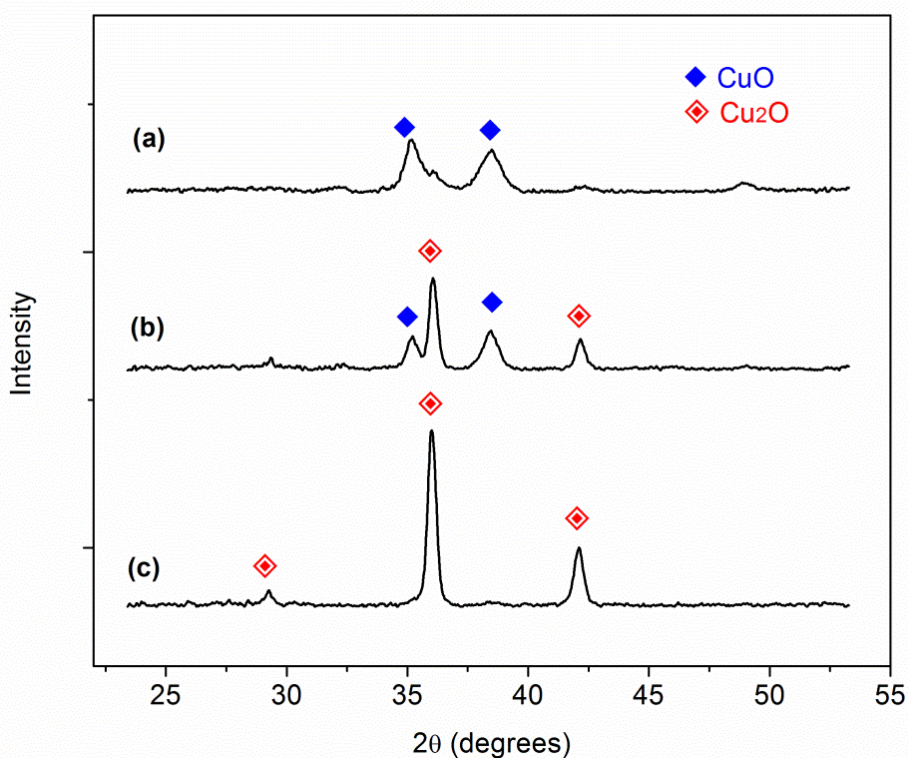

**Fig. S1** XRD spectra of 300 nm thick copper oxide thin film deposited on Si: (a) as deposited at 350 °C before final annealing; (b) annealed at 500 °C in nitrogen for 30 minutes; (c) annealed at 500 °C in nitrogen for 90 minutes.

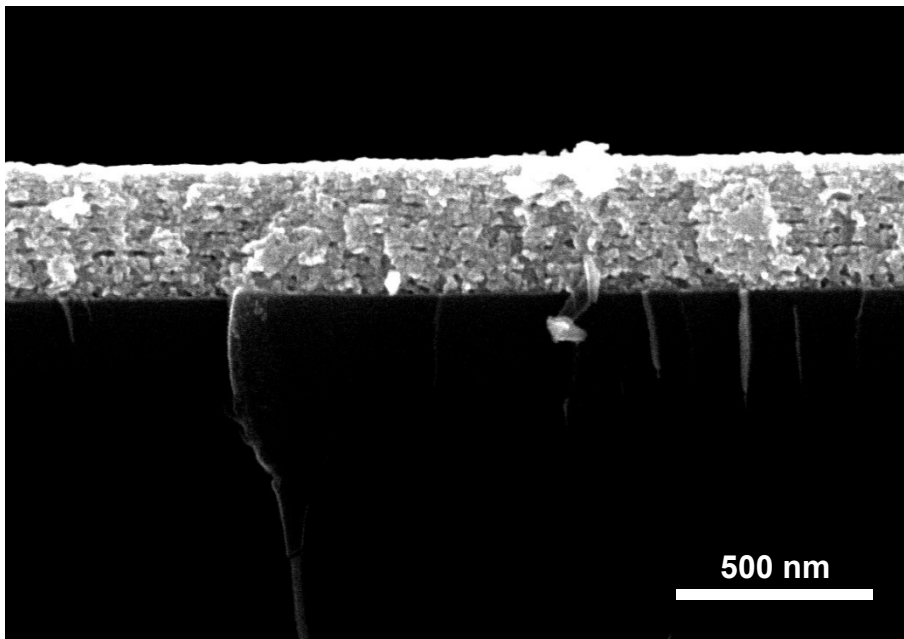

**Fig. S2** Cross section SEM image of copper oxide thin film deposited on Si, showing a smooth film with thickness of about 300 nm.

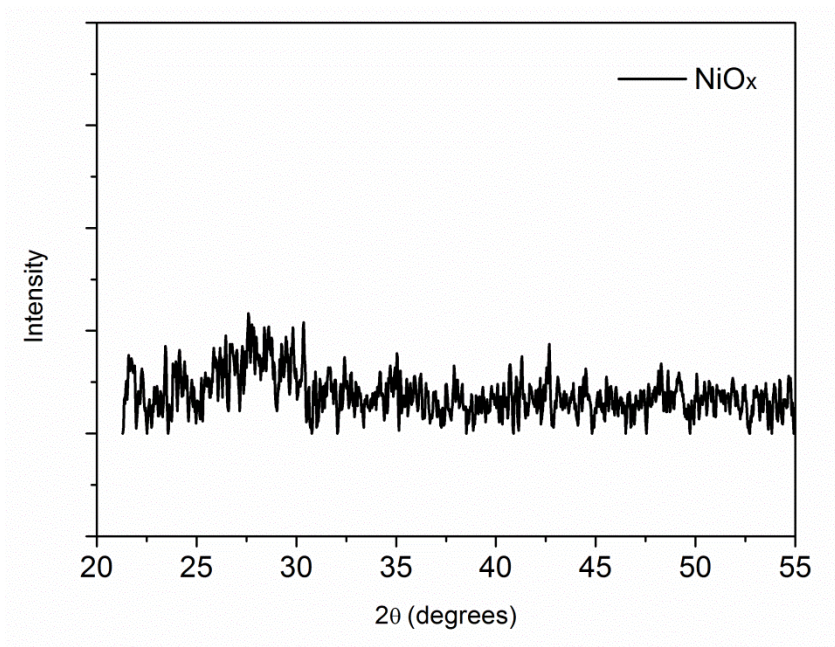

**Fig. S3** XRD spectra of NiO<sub>x</sub> thin film supported on Si annealed at 200 °C.

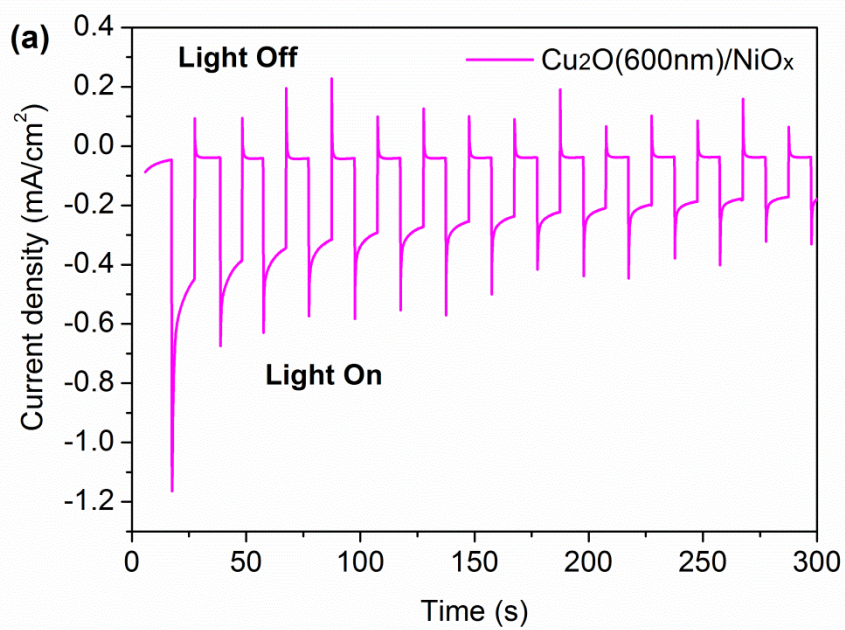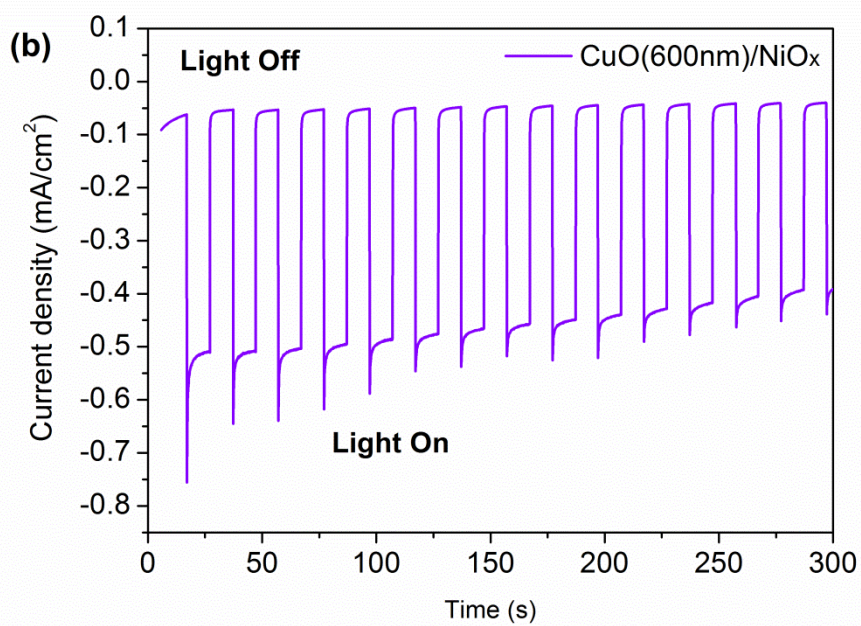

**Fig. S4** Photocurrent stability of  $\text{Cu}_2\text{O}$  and  $\text{CuO}$  photocathodes incorporated with  $\text{NiO}_x$  co-catalyst.

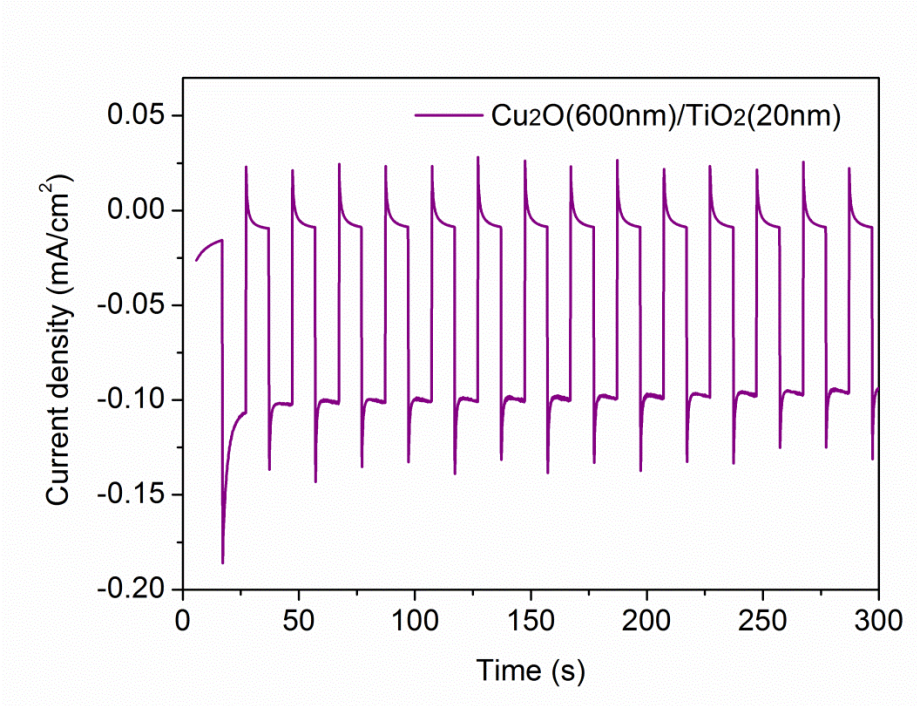

**Fig. S5** Photocurrent stability of  $\text{Cu}_2\text{O}$  photocathode encapsulated with a 20 nm thick  $\text{TiO}_2$  layer that was deposited by atomic layer deposition (ALD).
